# Supplementary material for: Genome-wide analysis of long intergenic non-coding RNAs in chickpea and their potential role in flower development
Source: PubMed Central journal article supplement (PMC5024101; doi:10.1038/srep33297), 2016-09-15
Supplement: srep33297-s1.pdf [file srep33297-s1.pdf]

## **Supplementary Information**

### **Genome-wide analysis of long intergenic non-coding RNAs in chickpea and their potential role in flower development**

Niraj Khemka<sup>1</sup>, Vikash Kumar Singh<sup>2</sup>, Rohini Garg<sup>2</sup>, Mukesh Jain<sup>1,2\*</sup>

<sup>1</sup>School of Computational and Integrative Sciences, Jawaharlal Nehru University, New Delhi-110067, India

<sup>2</sup>National Institute of Plant Genome Research, Aruna Asaf Ali Marg, New Delhi-110067, India

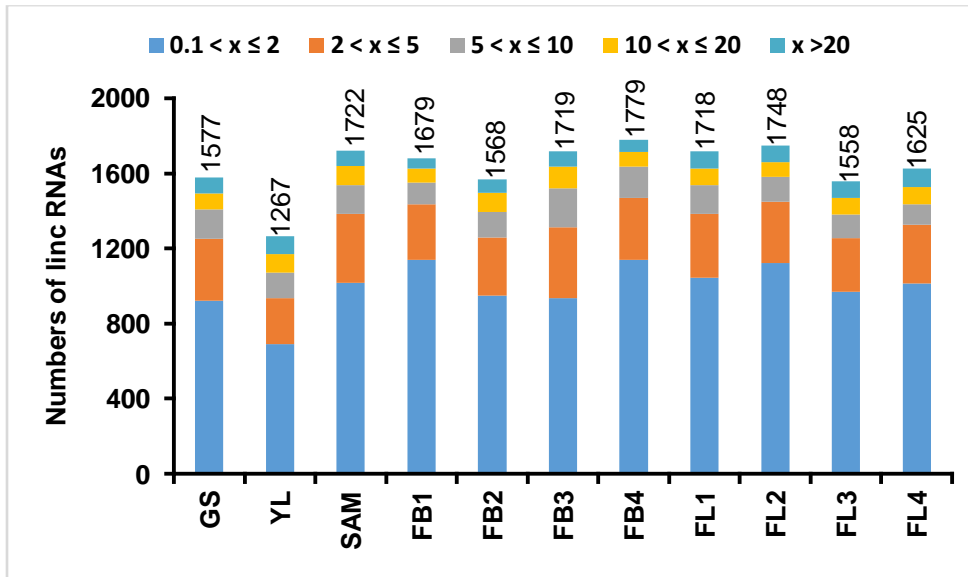

**Supplementary Figure S1.** Distribution of lincRNAs in different classes based on their expression level. Total number of expressed lincRNAs in each tissue has been indicated.

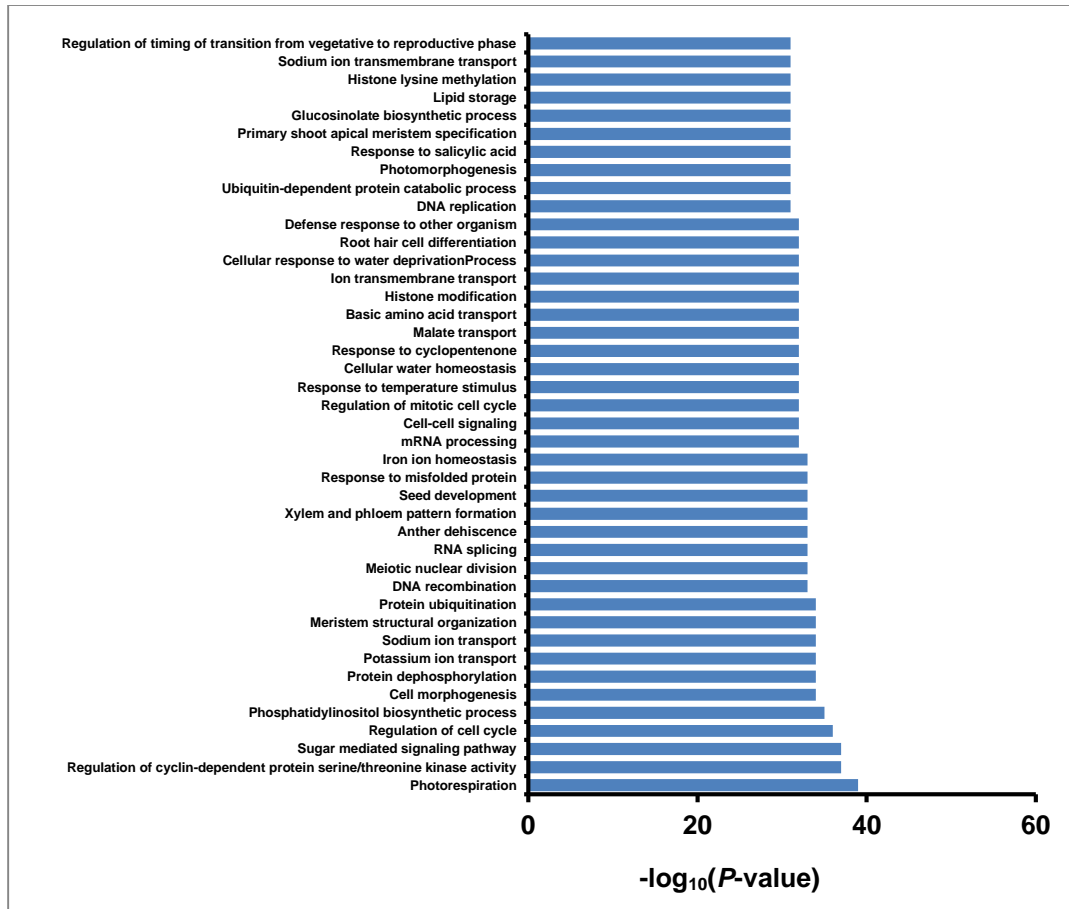

Supplementary Figure S2. Highly frequent GO terms in overall lincRNAs annotation.

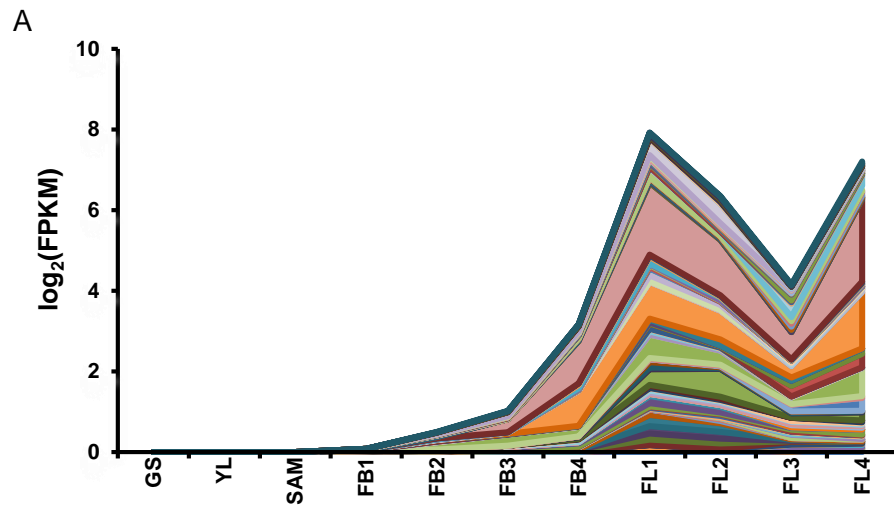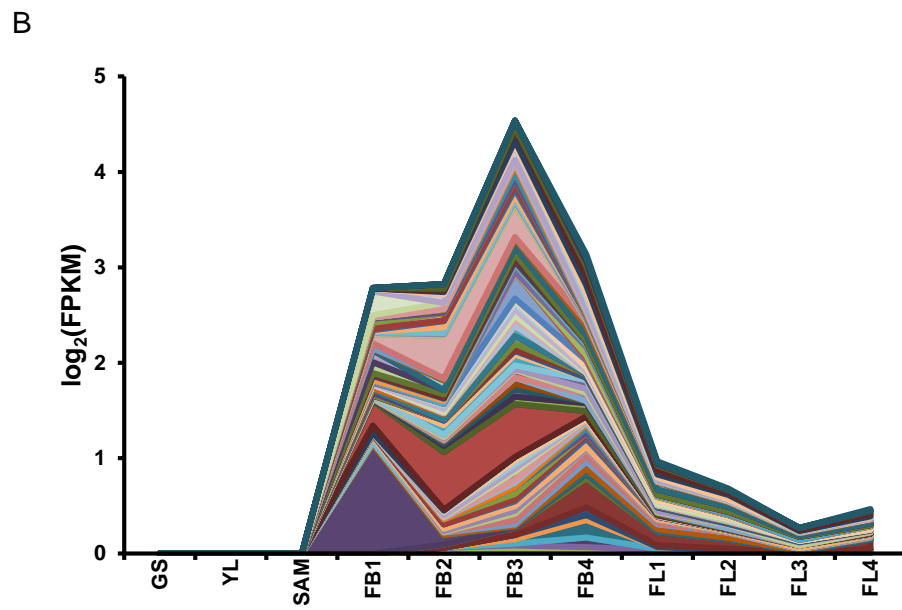

**Supplementary Figure S3.** Expression patterns of lincRNAs expressed specifically in flower bud (A) and flower (B) tissues of chickpea.

A

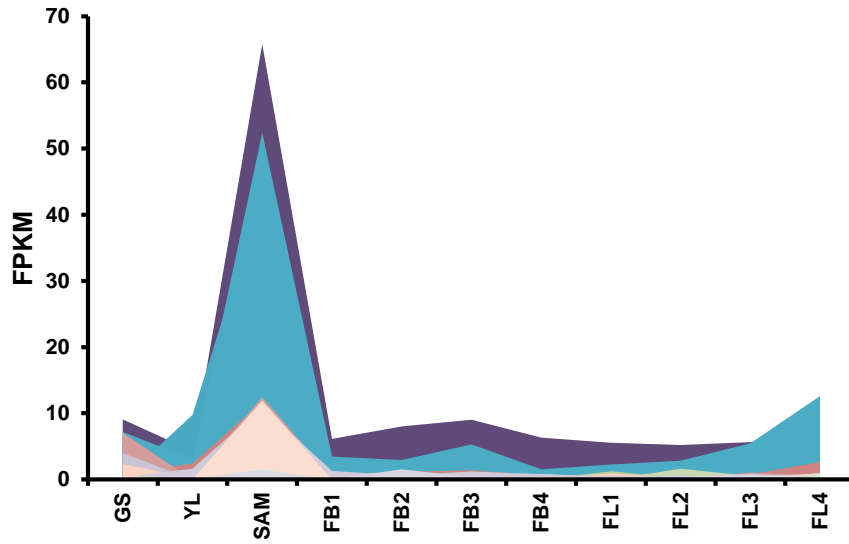

B

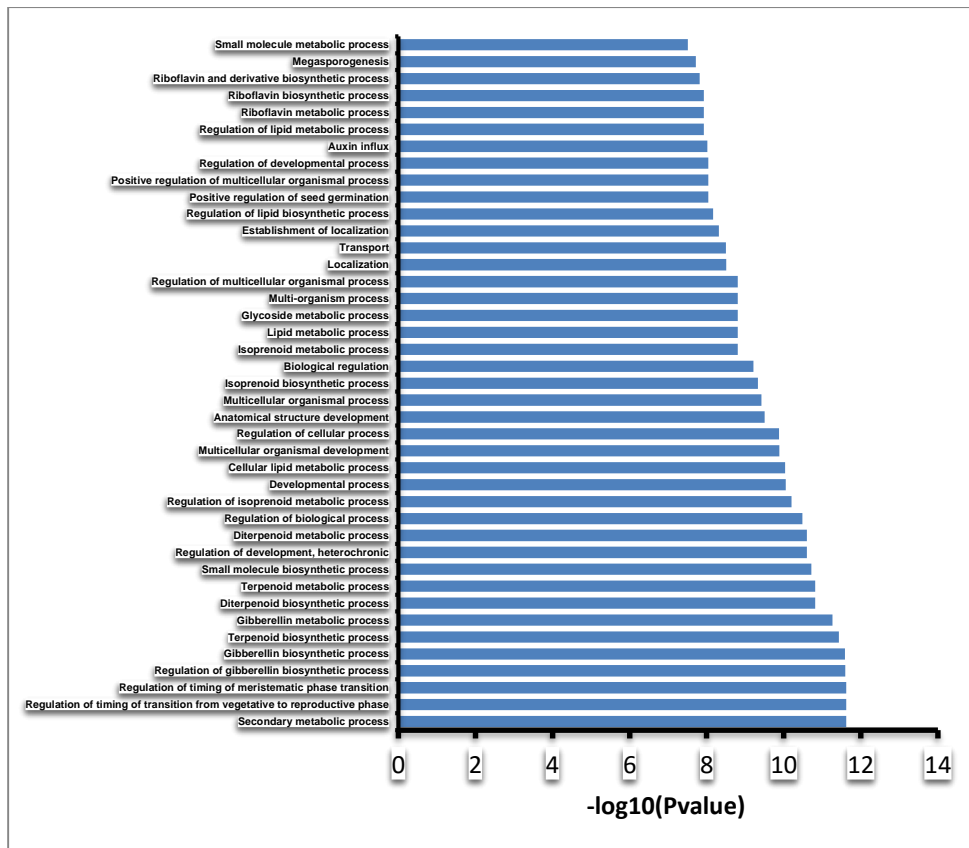

**Supplementary Figure S4.** Shoot apical meristem (SAM) specific lincRNAs expression pattern (A) and gene ontology enrichment analysis (B). Top GO terms showing very high enrichment are shown.

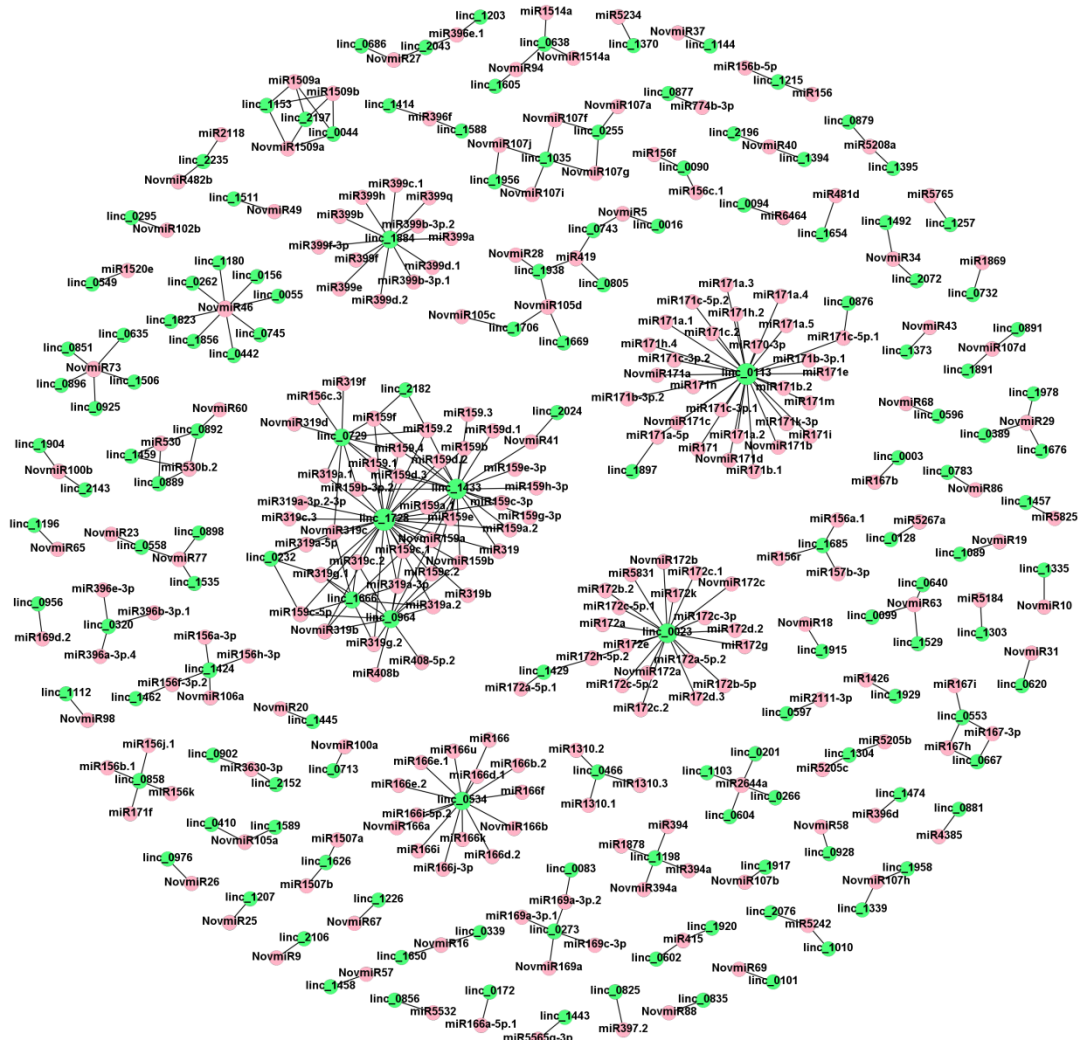

**Supplementary Figure S5.** LincRNA - miRNA interaction network in chickpea. Red circle nodes represent miRNAs and green circle nodes represent lincRNAs.

**Supplementary Table S1.** Summary of tissue samples and sequence data used with mapping statistics.

| <b>Tissue</b>                 | <b>Total reads</b> | <b>HQ reads</b> | <b>Total mapped</b> | <b>% mapped read</b> |
|-------------------------------|--------------------|-----------------|---------------------|----------------------|
| Germinating seedling (GS)     | 27889925           | 25954346        | 25321953            | 97.56                |
| Young leaf (YL)               | 32762959           | 30339998        | 28892367            | 95.23                |
| Shoot apical meristem (SAM)   | 36003749           | 34508868        | 33868015            | 98.14                |
| Flower bud 0.4 cm ( FB1)      | 41850211           | 36409370        | 34543919            | 94.88                |
| Flower bud 0.6 cm ( FB2)      | 17827737           | 16064057        | 15518412            | 96.6                 |
| Flower bud 0.8 cm ( FB3)      | 41365615           | 39663080        | 38226953            | 96.38                |
| Flower bud 0.8 cm open ( FB4) | 35211613           | 32605824        | 31846686            | 97.67                |
| Flower unopened 1cm (FL1)     | 29091495           | 27624457        | 27029338            | 97.85                |
| Flower opened 1cm (FL2)       | 33634177           | 32109896        | 31495523            | 98.09                |
| Flower mature (FL3)           | 26396381           | 22418080        | 21244187            | 94.76                |
| Flower drooped (FL4)          | 30245721           | 26865870        | 26406217            | 98.29                |

**Supplementary Table S2.** Genomic features and expression profiles of all 2248 lincRNAs identified in chickpea.

*(Provided as separate MS Excel file)*

**Supplementary Table S3.** Tissue (FB, FL and SAM) specific chickpea lincRNAs and their co-expressed chickpea transcripts (expression in 11 tissues) with their orthologs in soybean.

*(Provided as separate MS Excel file)*

**Supplementary Table S4.** Functional annotation (GO assignment) of chickpea lincRNAs.

*(Provided as separate MS Excel file)*

**Supplementary Table S5.** List of miRNAs targeting the predicted chickpea lincRNAs.

*(Provided as separate MS Excel file)*

**Supplementary Table S6.** Primers used in qRT-PCR validation of lincRNAs

| <b>LincRNA ID</b> | <b>Forward primer</b>         | <b>Reverse primer</b>       |
|-------------------|-------------------------------|-----------------------------|
| Ca_linc_0051      | CAAAAGATGGACAATGGCGAAT        | CACTCACGTGCCACATTGAAT       |
| Ca_linc_0077      | CACACTAAGAAAGACCAAAAATACAAAGA | ACAAGCAATTAATGTGGCAGCTAA    |
| Ca_linc_0135      | GAATGACACAATTCCATAATCACTAAAAC | CCAGTGAGAATTTCTTGCCTTT      |
| Ca_linc_0139      | TTCAAGGGAGGAATCAATGTTATG      | AAGAGCTCAAGATCCCAATGATG     |
| Ca_linc_0236      | TCCTTCTTTGGTTCCATTTTCC        | GCTTCCCACCTTCTTGAGTTCTTG    |
| Ca_linc_0616      | TGGGATTAGAGGCACACATG          | ACTCCTTTTCATTTATCTTTTTTGT   |
| Ca_linc_0691      | TTTTGGTAAACAACCTTCCACATTT     | TTGAAGCCTAAGAAAGACAATATTGG  |
| Ca_linc_0827      | ATATTCTCACCCCAACCACAT         | TGGCCATTGTGTAATTTTGAGAGT    |
| Ca_linc_0900      | TGGAGAGGTGTAGGGTTGTTGA        | CTTGCCACCCCTTACACTTTCT      |
| Ca_linc_1012      | TTGGATCCATTTGAAGTTAAGAGTT     | CGAACCCACAAGGATCTCTGT       |
| Ca_linc_1036      | GGGAAAAATGGTCAGCAACAA         | TTATTTTCATGGCACATTTCACTCTTT |
| Ca_linc_1166      | GATCATATACGTTAGCCCTGATTTTCAAG | AGTGACATTGGTTGAAGGTGAAAC    |
| Ca_linc_1441      | GGTCAAGATCAAGAGACAAGTCCAA     | CCTGGTTGATCGGTTTGTTTTC      |
| Ca_linc_1869      | GAGAAGGTTCTGGGATTCATCAT       | GGTTGCCTTGCAAAATTAATACAA    |
| Ca_linc_2200      | GGCCCATGATCATTTAAGCAA         | CCCCCTGACTTGATGTTTCTG       |

**Supplementary Data S1.** Sequences of predicted lincRNAs.

*(Provided as separate text file)*
